# Supplementary material for: Preparation of magnetic silica supported Brønsted acidic ionic liquids for the depolymerization of lignin to aromatic monomers
Source: Royal Society of Chemistry journal article supplement (doi:10.1039/d1nj04777a), 2022-01-01
Supplement: d1nj04777a1.pdf [file d1nj04777a1.pdf]

## **Preparation of magnetic silica supported Brønsted acidic ionic liquids for the depolymerization of lignin to aromatic monomers**

Mingyu Cui<sup>‡a</sup>, Dingkai Wang<sup>‡a</sup>, Yanjun Li<sup>a,b</sup>, Wei Zhao<sup>a\*</sup>, Chong Liang<sup>a</sup>, Xutang Liu<sup>a</sup>, Shuiyuan Fu<sup>a</sup>, Luyao

Wang<sup>a</sup>, Xianyong Wei<sup>a</sup>

<sup>a</sup> Jiangsu Province Engineering Research Center of Fine Utilization of Carbon Resources, China University of Mining & Technology, Xuzhou 221116, Jiangsu, China

<sup>b</sup> Shaanxi Key Laboratory of Low Metamorphic Coal Clean Utilization, School of Chemistry and Chemical Engineering, Yulin University, Yulin 719000, Shaanxi, China

---

\* Corresponding author

E-mail address: [zhaow1965@163.com](mailto:zhaow1965@163.com).

‡ These authors contributed equally to this work.

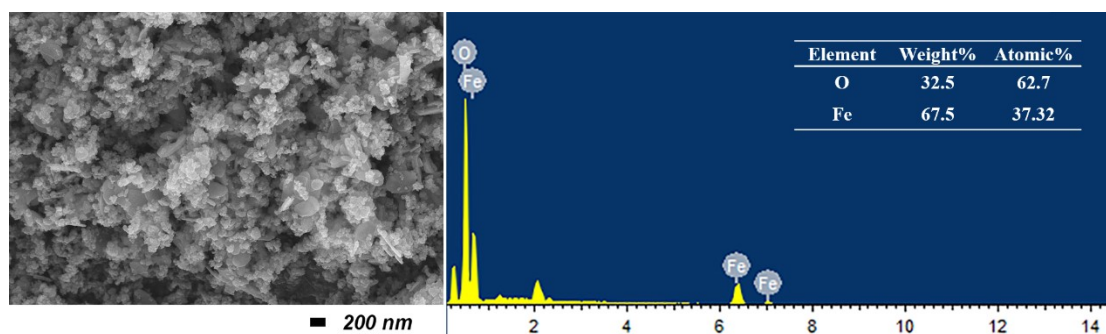

Fig. S1 SEM-EDS image of  $\text{Fe}_3\text{O}_4$ .

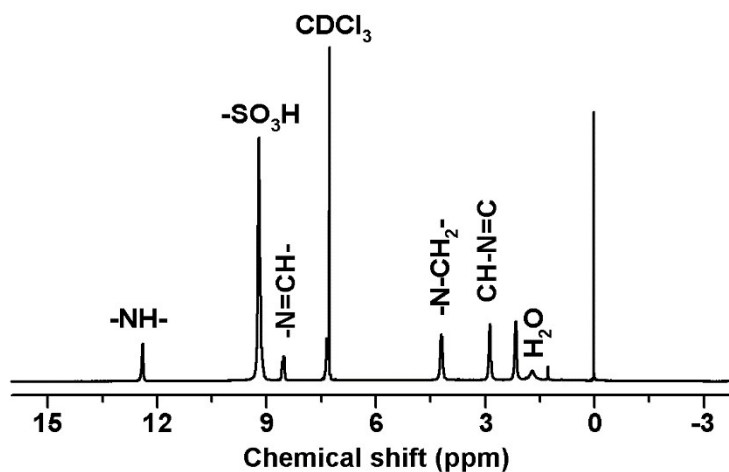

Fig. S2  $^1\text{H}$ -NMR spectra of BAIL. <sup>a</sup>

<sup>a</sup>  $^1\text{H}$  NMR (600 MHz,  $\text{CDCl}_3$ ),  $\delta$  12.40 (s, 1H), 9.22 (s, 9H), 8.95–8.23 (m, 1H), 7.32 (d,  $J = 41.5$  Hz, 3H), 4.21 (s, 2H), 4.00 – 3.64 (m, 1H), 2.87 (s, 2H), 2.12 (t,  $J = 28.9$  Hz, 2H), 1.79 (d,  $J = 94.2$  Hz, 1H), 1.44 – 1.11 (m, 1H), 0.02 (s, 1H).

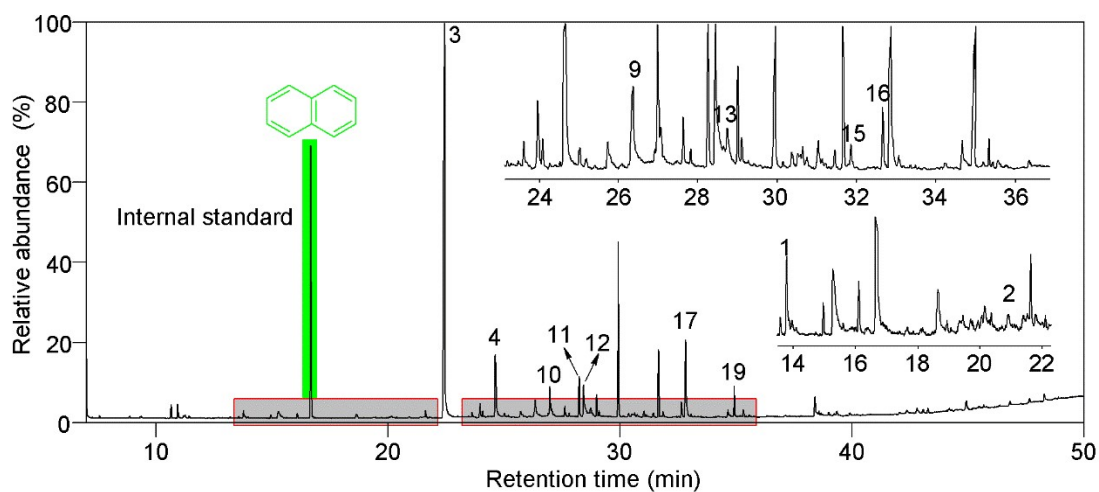

Fig. S3 Total ions chromatogram of liquid products from lignin depolymerization over 40 wt% BAIL (30wt%)- $\text{Fe}_3\text{O}_4$ @ $\text{SiO}_2$  at 160  $^\circ\text{C}$  for 3 h. (Identified by GC/MS, naphthalene as the internal standard)

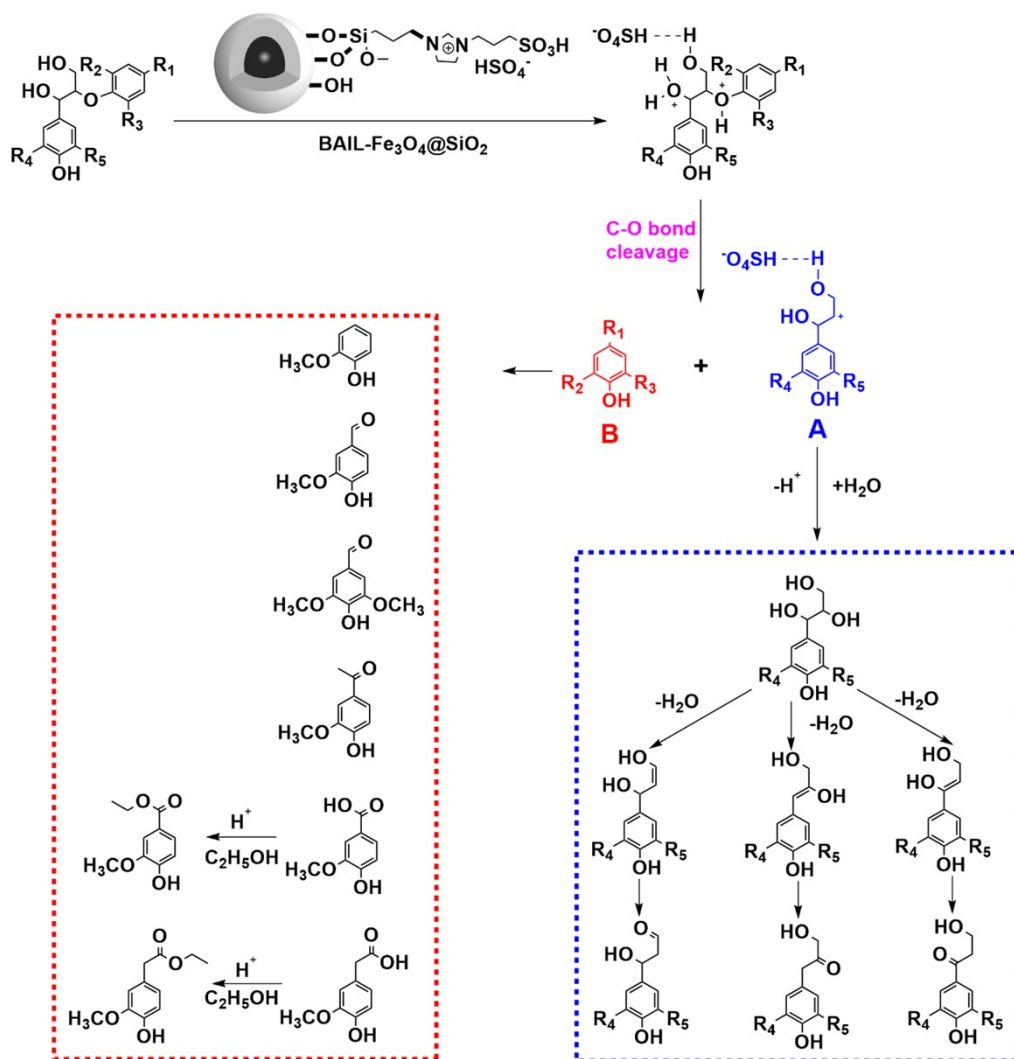

**Fig. S4** Possible mechanism proposed for the catalytic depolymerization of lignin over 40 wt% BAIL (30wt%)-Fe<sub>3</sub>O<sub>4</sub>@SiO<sub>2</sub>.

**Table S1** Lignin depolymerization products. <sup>a</sup> (Identified by GC-MS)

| Classification                           | Entry<br><i>b</i> | Compounds                                           | Formula                                          | Yield of main products (%) |                                                            |                   |                                                                              |
|------------------------------------------|-------------------|-----------------------------------------------------|--------------------------------------------------|----------------------------|------------------------------------------------------------|-------------------|------------------------------------------------------------------------------|
|                                          |                   |                                                     |                                                  | None                       | 40 wt%<br>Fe <sub>3</sub> O <sub>4</sub> @SiO <sub>2</sub> | 20<br>wt%<br>BAIL | 40 wt% BAIL<br>(30 wt%)-<br>Fe <sub>3</sub> O <sub>4</sub> @SiO <sub>2</sub> |
| Phenol                                   | 1                 | 2-Methoxyphenol                                     | C <sub>7</sub> H <sub>8</sub> O <sub>2</sub>     | 0.27                       | 0.17                                                       | 0.7               | 0.33                                                                         |
|                                          | 6                 | 2,6-Di-tert-butylphenol                             | C <sub>14</sub> H <sub>22</sub> O                |                            | 0.14                                                       |                   |                                                                              |
|                                          | 2                 | 4-Hydroxybenzaldehyde                               | C <sub>7</sub> H <sub>6</sub> O <sub>2</sub>     |                            | 0.15                                                       |                   |                                                                              |
| Aryl aldehyde                            | 3                 | Vanillin                                            | C <sub>8</sub> H <sub>8</sub> O <sub>3</sub>     | 11.9<br>3                  | 12.96                                                      | 9.38              | 18.42                                                                        |
|                                          | 13                | 4-Hydroxy-3,5-dimethoxybenzaldehyde                 | C <sub>9</sub> H <sub>10</sub> O <sub>4</sub>    | 0.13                       | 0.22                                                       |                   | 0.75                                                                         |
|                                          | 7                 | Methyl 2-(4-hydroxy-3-methoxyphenyl) acetate        | C <sub>10</sub> H <sub>12</sub> O <sub>4</sub>   |                            |                                                            | 0.8               |                                                                              |
| Aryl ester                               | 10                | Ethyl 4-hydroxy-3-methoxybenzoate                   | C <sub>10</sub> H <sub>12</sub> O <sub>4</sub>   | 0.21                       | 0.40                                                       | 7.97              | 1.11                                                                         |
|                                          | 11                | Ethyl homovanillate                                 | C <sub>11</sub> H <sub>14</sub> O <sub>4</sub>   | 0.10                       | 0.18                                                       | 0.93              | 1.33                                                                         |
|                                          | 16                | 2-Methoxy-4-(2-oxopropyl) phenyl acetate            | C <sub>12</sub> H <sub>14</sub> O <sub>4</sub>   |                            |                                                            |                   | 0.54                                                                         |
|                                          | 18                | Butyl (4-methylpentyl) phthalate                    | C <sub>18</sub> H <sub>26</sub> O <sub>4</sub>   |                            |                                                            | 0.50              |                                                                              |
| Aryl ketone                              | 19                | Dibutyl phthalate                                   | C <sub>16</sub> H <sub>22</sub> O <sub>4</sub>   |                            | 0.09                                                       |                   | 0.95                                                                         |
|                                          | 4                 | Apocynin                                            | C <sub>9</sub> H <sub>10</sub> O <sub>3</sub>    | 0.95                       | 1.48                                                       | 2.15              | 3.06                                                                         |
|                                          | 17                | 2-Hydroxy-1-(4-hydroxy-3-methoxyphenyl) ethan-1-one | C <sub>9</sub> H <sub>10</sub> O <sub>4</sub>    |                            |                                                            |                   | 3.18                                                                         |
| Aryl acid                                | 9                 | 4-Hydroxy-3-methoxybenzoic acid                     | C <sub>8</sub> H <sub>8</sub> O <sub>4</sub>     | 0.46                       | 1.01                                                       |                   | 1.20                                                                         |
|                                          | 12                | Homovanillic acid                                   | C <sub>9</sub> H <sub>10</sub> O <sub>4</sub>    | 0.29                       | 0.73                                                       |                   | 1.91                                                                         |
| Aryl alcohol                             | 8                 | Homovanillyl alcohol                                | C <sub>9</sub> H <sub>12</sub> O <sub>3</sub>    |                            | 0.12                                                       |                   |                                                                              |
| Heteroatoms-containing aromatic monomers | 5                 | S-methyl 4-(methylthio) benzothioate                | C <sub>9</sub> H <sub>10</sub> OS <sub>2</sub>   |                            | 0.13                                                       |                   |                                                                              |
|                                          | 14                | 4-(Methylphenylthio) acetaldehyde diethyl acetal    | C <sub>13</sub> H <sub>20</sub> O <sub>2</sub> S | 0.13                       |                                                            |                   |                                                                              |
|                                          | 15                | Ethamivan                                           | C <sub>12</sub> H <sub>17</sub> NO <sub>3</sub>  |                            |                                                            |                   | 0.25                                                                         |

<sup>a</sup> Reaction conditions: 160 °C, 3 h, 0.5 g of lignin, 30 mL of ethanol, and 1 MPa of N<sub>2</sub>.<sup>b</sup> Relative to Fig. S3.

**Table. S2** Mass distribution and DBE distribution of the species identified with Q-Exactive Orbitrap MS in the ethanol-soluble products.

| Catalyst                                                           | Mass distribution of the species identified <sup>a</sup> |         |         |         | DBE distribution of the species identified <sup>b</sup> |     |    | Total |
|--------------------------------------------------------------------|----------------------------------------------------------|---------|---------|---------|---------------------------------------------------------|-----|----|-------|
|                                                                    | <150                                                     | 150~250 | 250~350 | 350~450 | 1-3                                                     | 4-7 | ≥8 |       |
| None                                                               | 19                                                       | 41      | 39      | 8       | 20                                                      | 56  | 31 | 107   |
| BAIL                                                               | 9                                                        | 30      | 17      | 5       | 21                                                      | 30  | 10 | 61    |
| Fe <sub>3</sub> O <sub>4</sub> @SiO <sub>2</sub>                   | 13                                                       | 31      | 21      | 7       | 27                                                      | 33  | 12 | 72    |
| BAIL (30 wt%)-<br>Fe <sub>3</sub> O <sub>4</sub> @SiO <sub>2</sub> | 21                                                       | 43      | 42      | 14      | 14                                                      | 63  | 43 | 120   |

<sup>a</sup> Number of the species identified with Q-Exactive Orbitrap MS in different molecular mass ranges.

<sup>b</sup> Number of the species identified with Q-Exactive Orbitrap MS in different DBE ranges.
